# Supplementary material for: Characterization of global transcription profile of normal and HPV-immortalized keratinocytes and their response to TNF treatment
Source: PubMed Central journal article supplement (PMC2459201; doi:10.1186/1755-8794-1-29), 2008-06-27
Supplement: 1755-8794-1-29-S1.pdf [file 1755-8794-1-29-S1.pdf]

| GENE          | UniGene ID | GENE NAME                                                                | FUNCTION                                                                                 |
|---------------|------------|--------------------------------------------------------------------------|------------------------------------------------------------------------------------------|
| BCL2L13       | Hs.699302  | BCL2-like 13                                                             | apoptosis facilitator                                                                    |
| C20orf1       | -----      | -----                                                                    | -----                                                                                    |
| CARS          | Hs.274873  | cysteinyl-tRNA synthetase                                                | Aminoacyl-tRNA biosynthesis, Cysteine metabolism                                         |
| CAV1          | Hs.74034   | caveolin 1                                                               | cholesterol homeostasis, cholesterol transport, inactivation of MAPK activity            |
| CCL20         | Hs.75498   | chemokine (C-C motif) ligand 20                                          | inflammatory response                                                                    |
| COL4A1        | Hs.17441   | collagen, type IV, alpha 1                                               | extracellular matrix structural constituent                                              |
| DHX9/DDX9     | Hs.191518  | DEAH (Asp-Glu-Ala-His) box polypeptide 9                                 | ATP binding                                                                              |
| DKFZP564F0522 | Hs.468140  | DKFZP564F0522                                                            | phosphopantetheine binding                                                               |
| DKFZp761H0421 | Hs.632255  | RUN domain containing 1                                                  | unknown function                                                                         |
| ELF3          | Hs.67928   | E74-like factor 3 (ets domain transcription factor, epithelial-specific) | epidermis development                                                                    |
| FLJ12787      | Hs.406703  | Src-associated protein SAW                                               | cell cycle control and apoptosis                                                         |
| FLJ21870      | Hs.355455  | ANKRD57                                                                  |                                                                                          |
| FLJ22087      | Hs.591183  | amplified in breast cancer 1                                             | unknown function                                                                         |
| FLJ23476      | Hs.301564  | yrdC domain containing                                                   | negative regulation of transport                                                         |
| FLJ25804      | Hs.33366   | cell division cycle associated 2                                         | unknown function                                                                         |
| GFPT2         | Hs.30332   | glutamine-fructose-6-phosphate transaminase 2                            | carbohydrate biosynthesis                                                                |
| GPR56         | Hs.513633  | G protein-coupled receptor 56                                            | cell adhesion                                                                            |
| HBP17         | Hs.1690    | fibroblast growth factor binding protein 1                               | regulation of cell proliferation                                                         |
| HMGE          | Hs.443723  | GrpE-like 1                                                              | unfolded protein binding, adenylyl-nucleotide exchange factor activity                   |
| Hs.S2140567   | Hs.485233  | mitogen-activated protein kinase kinase kinase 14                        | Apoptosis, Keratinocyte Differentiation, MAPK signaling pathway, NF-kB Signaling Pathway |
| HSPH1         | Hs.36927   | heat shock 105kDa/110kDa protein 1                                       | protein folding                                                                          |
| KIAA0063      | Hs.3094    | Josephin domain containing 1                                             | unknown function                                                                         |
| KIAA0247      | Hs.440025  | KIAA0247                                                                 | unknown function                                                                         |
| KIAA0438      | Hs.483036  | praja 2                                                                  | ligase activity                                                                          |
| KLK7          | Hs.151254  | kallikrein 7 (chymotryptic, stratum corneum)                             | epidermis development, proteolysis and peptidolysis, chymotrypsin activity               |
| LOC112970     | Hs.476033  | thioredoxin domain containing 12                                         | Glutathione metabolism                                                                   |
| LSM3          | Hs.111632  | LSM3 homolog, U6 small nuclear RNA associated                            | pre-mRNA splicing factor activity                                                        |
| LXN           | Hs.478067  | latexin                                                                  | enzyme inhibitor activity                                                                |
| MTSG1         | Hs.7946    | mitochondrial tumor suppressor 1                                         | oxidoreductase activity, receptor activity                                               |
| NCOA1         | Hs.412293  | nuclear receptor coactivator 1                                           | signal transduction                                                                      |
| NKTR          | Hs.529509  | natural killer-tumor recognition sequence                                | protein folding                                                                          |
| NRF           | Hs.437084  | NF-kappaB repressing factor                                              | negative regulation of transcription                                                     |
| NSE1          | Hs.260855  | NSE1                                                                     | unknown function                                                                         |
| NYREN18       | Hs.173024  | NEDD8 ultimate buster-1                                                  | ubiquitin/proteasome pathway                                                             |
| PCTK3         | Hs.445402  | PCTAIRE protein kinase 3                                                 | signal transduction                                                                      |
| PEX3          | Hs.7277    | peroxisomal biogenesis factor 3                                          | peroxisome organization and biogenesis                                                   |
| POLQ          | Hs.241517  | polymerase (DNA directed), theta                                         | DNA repair                                                                               |
| RBM12         | Hs.246413  | copine 1                                                                 | lipid metabolic process                                                                  |
| RGS2          | Hs.78944   | regulator of G-protein signalling 2                                      | cell cycle regulation                                                                    |
| SF1           | Hs.502829  | splicing factor 1                                                        | regulation of transcription, DNA-dependent                                               |
| SFRS3         | Hs.405144  | splicing factor, arginine/serine-rich 3                                  | nuclear mRNA splicing, via spliceosome                                                   |
| STHM          | Hs.207459  | ST6                                                                      | protein amino acid glycosylation                                                         |
| SYNJ2         | Hs.434494  | synaptojanin 2                                                           | phosphoinositide 5-phosphatase activity                                                  |
| TFPI2         | Hs.438231  | tissue factor pathway inhibitor 2                                        | serine-type endopeptidase inhibitor activity                                             |
| TFRC          | Hs.529618  | transferrin receptor (p90, CD71)                                         | endocytosis                                                                              |
| TP53INP1      | Hs.492261  | tumor protein p53 inducible nuclear protein 1                            | apoptosis                                                                                |
| Unknown       | -----      | -----                                                                    | -----                                                                                    |
| ZNF189        | Hs.50123   | zinc finger protein 189                                                  | regulation of transcription, DNA-dependent                                               |

\*Genes are listed in alphabetical order. The cutoff p-value was set as  $<10^{-9}$ .
