# Supplementary material for: Characterization of global transcription profile of normal and HPV-immortalized keratinocytes and their response to TNF treatment
Source: PubMed Central journal article supplement (PMC2459201; doi:10.1186/1755-8794-1-29), 2008-06-27
Supplement: 1755-8794-1-29-S3.pdf [file 1755-8794-1-29-S3.pdf]

**1<sup>a</sup>) PHK\_3H / HPV16\_3H****p value <0,0001**

| <b>gene</b> | <b>expression<br/>ratio<br/>(log<sub>2</sub>)</b> | <b>gene name</b>                                                                                        |
|-------------|---------------------------------------------------|---------------------------------------------------------------------------------------------------------|
| FLJ11301    | -1,78                                             | hypothetical protein<br>FLJ11301                                                                        |
| SF3B4       | -1,20                                             | splicing factor 3b, subunit 4                                                                           |
| B3GNT5      | 1,74                                              | UDP-GlcNAc:betaGal beta-1,3-N-<br>acetylglucosaminyltransferase 5                                       |
| KCNK6       | 3,79                                              | potassium channel, subfamily K, member 6                                                                |
| NCK2        | 0,45                                              | NCK adaptor protein 2                                                                                   |
| PGM1        | 1,81                                              | phosphoglucomutase 1                                                                                    |
| GLDC        | -2,37                                             | glycine dehydrogenase (decarboxylating; glycine<br>decarboxylase,<br>glycine cleavage system protein P) |
| POLS        | 1,20                                              | polymerase (DNA directed) sigma                                                                         |
| LOC56851    | 1,90                                              | chromosome 15 open reading frame 24<br>solute carrier family 39 (zinc transporter), member<br>6         |
| SLC39A6     | 1,02                                              |                                                                                                         |
| PRSS11      | 4,27                                              | protease, serine, 11 (IGF binding)                                                                      |
| ENC1        | 1,41                                              | ectodermal-neural cortex (with BTB-like domain)<br>RER1 retention in endoplasmic reticulum 1<br>homolog |
| RER1        | 1,69                                              |                                                                                                         |
| MGAM        | -2,09                                             | maltase-glucoamylase (alpha-glucosidase)                                                                |
| ITPKC       | -6,60                                             | inositol 1,4,5-trisphosphate 3-kinase C                                                                 |
| XTP3TPB     | -1,19                                             | chromosome 2 open reading frame 30                                                                      |
| RPL15       | 2,53                                              | ribosomal protein L15                                                                                   |
| ANKRD11     | 3,20                                              | ankyrin repeat domain 11<br>CD44 antigen (homing function and Indian blood group<br>system)             |
| CD44        | 1,28                                              |                                                                                                         |
| SAT2        | 1,98                                              | solute carrier family 38, member 2                                                                      |
| CKLFSF4     | -6,59                                             | chemokine-like factor super family 4                                                                    |
| SRP72       | 2,26                                              | signal recognition particle 72kDa                                                                       |
| EIF4EBP2    | -3,79                                             | eukaryotic translation initiation factor 4E binding protein 2                                           |
| ZNF262      | -0,62                                             | zinc finger protein 262                                                                                 |
| ZNF266      | 0,93                                              | zinc finger protein 266                                                                                 |
| EXTL2       | -5,38                                             | exostoses (multiple)-like 2                                                                             |

**2<sup>a</sup>) PHK\_3 H / HPV18\_3H****p value <0,0001**

| <b>gene</b> | <b>expression<br/>ratio<br/>(log<sub>2</sub>)</b> | <b>gene name</b>                                       |
|-------------|---------------------------------------------------|--------------------------------------------------------|
| MAPRE2      | -6,89                                             | microtubule-associated protein, RP/EB family, member 2 |
| BCL3        | -3,33                                             | B-cell CLL/lymphoma 3                                  |
| DDX52       | -1,90                                             | DEAD (Asp-Glu-Ala-Asp) box polypeptide 52              |
| LCN7        | -5,84                                             | lipocalin 7                                            |

|          |       |                                                                                                    |
|----------|-------|----------------------------------------------------------------------------------------------------|
| CNNM3    | -6,69 | cyclin M3                                                                                          |
| ITPKC    | -6,16 | inositol 1,4,5-trisphosphate 3-kinase C                                                            |
| UBE2I    | -1,85 | ubiquitin-conjugating enzyme E2I (UBC9 homolog, yeast)                                             |
| KCTD15   | -6,30 | potassium channel tetramerisation domain containing 15                                             |
| GIT1     | -6,38 | G protein-coupled receptor kinase interactor 1                                                     |
| CKLFSF4  | -6,26 | chemokine-like factor super family 4                                                               |
| UBP1     | -1,90 | upstream binding protein 1 (LBP-1a)<br>hypothetical protein                                        |
| FLJ10700 | -4,33 | FLJ10700                                                                                           |
| IL6ST    | -3,15 | interleukin 6 signal transducer (gp130, oncostatin M receptor)                                     |
| SLPI     | -2,80 | secretory leukocyte protease inhibitor (antileukoproteinase)<br>ADP-ribosylation factor 4-<br>like |
| ARF4L    | -1,61 | like                                                                                               |
| SPAG9    | -3,85 | sperm associated antigen 9                                                                         |
| SURF5    | -0,95 | surfeit 5                                                                                          |
| MIR16    | 0,67  | membrane interacting protein of RGS16                                                              |

### 3<sup>a</sup>) HPV16\_3H / HPV18\_3H

p value <0,0001

| gene          | expression<br>ratio<br>(log2) | gene name                                                             |
|---------------|-------------------------------|-----------------------------------------------------------------------|
| C6orf48       | -1,47                         | chromosome 6 open reading frame 48                                    |
| STAF65(gamma) | -6,16                         | SPTF-associated factor 65 gamma<br>target of myb1-like 2<br>(chicken) |
| TOM1L2        | 1,03                          | (chicken)                                                             |
| SPG20         | -1,23                         | spastic paraplegia 20, spartin (Troyer syndrome)                      |

### 4<sup>a</sup>) PHK\_60H / HPV16\_60H

p value <0,0001

| gene     | expression<br>ratio<br>(log2) | gene name                                                                                         |
|----------|-------------------------------|---------------------------------------------------------------------------------------------------|
| FLJ21511 | 2,85                          | hypothetical protein<br>FLJ21511                                                                  |
| ROBO1    | 2,48                          | roundabout, axon guidance receptor, homolog 1 (Drosophila)                                        |
| SUPT5H   | -1,06                         | suppressor of Ty 5 homolog (S. cerevisiae)                                                        |
| LACTB2   | -1,69                         | lactamase, beta 2                                                                                 |
| OAS1     | -2,19                         | 2',5'-oligoadenylate synthetase 1, 40/46kDa                                                       |
| TFRC     | -1,41                         | transferrin receptor (p90, CD71)                                                                  |
| COX7B    | -1,41                         | cytochrome c oxidase subunit VIIb<br>interferon-induced protein<br>44                             |
| C1orf29  | -2,15                         | 44                                                                                                |
| ODC1     | 2,16                          | ornithine decarboxylase 1                                                                         |
| PPP3CA   | 1,54                          | protein phosphatase 3 (formerly 2B), catalytic<br>subunit,<br>alpha isoform (calcineurin A alpha) |
| PDHB     | 0,63                          | pyruvate dehydrogenase (lipoamide) beta                                                           |
| MEST     | -1,55                         | mesoderm specific transcript homolog (mouse)<br>5'-nucleotidase, ecto<br>(CD73)                   |
| NT5E     | 1,77                          | (CD73)                                                                                            |

TSPYL1 -1,69 TSPY-like 1

**5<sup>a</sup>) PHK\_60H / HPV18\_60H**

**p value <0,0001**

| gene          | expression ratio (log2) | gene name                                                          |
|---------------|-------------------------|--------------------------------------------------------------------|
| SCD           | -2,09                   | stearoyl-CoA desaturase (delta-9-desaturase)                       |
| CREG          | -2,33                   | cellular repressor of E1A-stimulated genes 1                       |
| FAP           | -2,45                   | fibroblast activation protein, alpha                               |
| CKLFSF6       | 2,22                    | chemokine-like factor super family 6                               |
| RUNDC1        | -1,18                   | RUN domain containing 1                                            |
| DHRS3         | -4,22                   | dehydrogenase/reductase (SDR family) member 3                      |
| ODC1          | 2,13                    | ornithine decarboxylase 1                                          |
| LXN           | -4,26                   | latexin                                                            |
| LOC56851      | -1,63                   | chromosome 15 open reading frame 24                                |
| MAL2          | -1,86                   | mal, T-cell differentiation protein 2                              |
| Ufc1          | -1,44                   | Ufm1-conjugating enzyme 1                                          |
| CLCA4         | 2,37                    | chloride channel, calcium activated, family member 4               |
| LOC129642     | -2,15                   | O-acyltransferase (membrane bound) domain containing 2             |
| ATF7          | -3,37                   | activating transcription factor 7                                  |
| FLJ34633      | -0,65                   | hypothetical protein FLJ34633                                      |
| XTP7          | -1,38                   | protein 7 transactivated by hepatitis B virus X antigen (HBxAg)    |
| SLC39A1       | -1,99                   | solute carrier family 39 (zinc transporter), member 1              |
| FLJ21511      | 1,95                    | hypothetical protein FLJ21511                                      |
| ATP6AP1       | 3,68                    | ATPase, H <sup>+</sup> transporting, lysosomal accessory protein 1 |
| PMP22         | -2,71                   | peripheral myelin protein 22                                       |
| IL4R          | -2,57                   | interleukin 4 receptor                                             |
| TSSC1         | -1,57                   | tumor suppressing subtransferable candidate 1                      |
| CLIC4         | 1,47                    | chloride intracellular channel 4                                   |
| NDFIP1        | 1,36                    | Nedd4 family interacting protein 1                                 |
| TSPYL1        | -2,01                   | TSPY-like 1                                                        |
| STAF65(gamma) | -6,17                   | SPTF-associated factor 65 gamma                                    |
| CUL4A         | 2,34                    | cullin 4A                                                          |
| TFRC          | -1,53                   | transferrin receptor (p90, CD71)                                   |
| ZNF335        | -1,74                   | zinc finger protein 335                                            |
| CDH18         | 2,02                    | cadherin 18, type 2                                                |
| KIAA1529      | -2,23                   | KIAA1529                                                           |
| SSR4          | -2,91                   | signal seq. receptor, delta (translocon-associated protein delta)  |
| NOTCH2        | 1,80                    | Notch homolog 2 (Drosophila)                                       |
| CENTD1        | 1,25                    | centaurin, delta 1                                                 |
| KLK8          | -3,04                   | kallikrein 8 (neuropsin/ovasin)                                    |

|          |       |                                                                                                                                                                |
|----------|-------|----------------------------------------------------------------------------------------------------------------------------------------------------------------|
| RER1     | -1,25 | RER1 retention in endoplasmic reticulum 1 homolog ( <i>S. cerevisiae</i> )                                                                                     |
| ROBO1    | 2,01  | roundabout, axon guidance receptor, homolog 1 ( <i>Drosophila</i> )                                                                                            |
| PRKCBP1  | -1,02 | protein kinase C binding protein 1                                                                                                                             |
| CDK10    | -1,66 | cyclin-dependent kinase (CDC2-like) 10<br>mitochondrial translation optimization 1 homolog ( <i>S. cerevisiae</i> )                                            |
| MTO1     | -2,15 |                                                                                                                                                                |
| KCNK6    | -2,90 | potassium channel, subfamily K, member 6                                                                                                                       |
| MYH10    | 1,00  | myosin, heavy polypeptide 10, non-muscle                                                                                                                       |
| SLMAP    | 2,40  | sarcolemma associated protein                                                                                                                                  |
| KPNA6    | -1,76 | karyopherin alpha 6 (importin alpha 7)                                                                                                                         |
| XPO7     | -2,20 | exportin 7                                                                                                                                                     |
| SLC30A9  | -1,54 | solute carrier family 30 (zinc transporter), member 9                                                                                                          |
| C6orf37  | -2,29 | family with sequence similarity 46, member A                                                                                                                   |
| RCL1     | -0,93 | RNA terminal phosphate cyclase-like 1                                                                                                                          |
| KIAA0853 | 0,83  | KIAA0853                                                                                                                                                       |
| SLC37A3  | -0,68 | solute carrier family 37 (glycerol-3-phosphate transporter), member 3<br>pleckstrin homology-like domain, family A, member 3                                   |
| PHLDA3   | -1,90 |                                                                                                                                                                |
| P4HB     | -4,79 | procollagen-proline, 2-oxoglutarate 4-dioxygenase (proline 4-hydroxylase), beta polypeptide (protein disulfide isomerase; thyroid hormone binding protein p55) |
| MAT2B    | 2,45  | methionine adenosyltransferase II, beta<br>ATP-binding cassette, sub-family E (OABP), member 1                                                                 |
| ABCE1    | 1,85  |                                                                                                                                                                |
| HNRPH3   | 1,53  | heterogeneous nuclear ribonucleoprotein H3 (2H9)                                                                                                               |
| COX7B    | -1,15 | cytochrome c oxidase subunit VIIb                                                                                                                              |
| BENE     | -2,08 | BENE protein                                                                                                                                                   |
| HERC3    | 0,79  | hect domain and RLD 3                                                                                                                                          |
| SUPT4H1  | -1,74 | suppressor of Ty 4 homolog 1 ( <i>S. cerevisiae</i> )<br>calcium/calmodulin-dependent serine protein kinase                                                    |
| CASK     | -1,38 | (MAGUK family)                                                                                                                                                 |

### 6<sup>a</sup>) HPV16\_60H / HPV18\_60H

p value < 0,0001

| gene          | expression ratio (log2) | gene name                                            |
|---------------|-------------------------|------------------------------------------------------|
| LXN           | -3,82                   | latexin<br>interferon-induced protein 44             |
| C1orf29       | 2,97                    |                                                      |
| STAF65(gamma) | -6,30                   | SPTF-associated factor 65 gamma                      |
| PDHB          | -0,72                   | pyruvate dehydrogenase (lipoamide) beta              |
| LOC129642     | -1,27                   | O-acyltransferase (membrane bound) domain containing |
| PRKCBP1       | -0,86                   | protein kinase C binding protein 1                   |
| YME1L1        | -1,66                   | YME1-like 1 ( <i>S. cerevisiae</i> )                 |
| XTP3TPB       | 0,51                    | chromosome 2 open reading frame 30                   |

**7<sup>a</sup>) PHK\_3H / PHK\_60H****p value <0,0001**

| gene     | expression      | gene name                                                     |
|----------|-----------------|---------------------------------------------------------------|
|          | ratio<br>(log2) |                                                               |
| CKLFSF6  | -2,27           | chemokine-like factor super family 6                          |
| PPARA    | -3,09           | peroxisome proliferative activated receptor, alpha            |
| CKLFSF4  | -7,19           | chemokine-like factor super family 4                          |
| EIF4EBP2 | -4,08           | eukaryotic translation initiation factor 4E binding protein 2 |
| SCD      | 1,43            | stearoyl-CoA desaturase (delta-9-desaturase)                  |
| MTA2     | -1,92           | metastasis associated 1 family, member 2                      |
| RUNDC1   | 1,24            | RUN domain containing 1                                       |
| KCTD15   | -7,23           | potassium channel tetramerisation domain containing 15        |
| ROBO1    | -2,32           | roundabout, axon guidance receptor, homolog 1 (Drosophila)    |
| HMGCR    | 1,75            | 3-hydroxy-3-methylglutaryl-Coenzyme A reductase               |
| DFFA     | -0,73           | DNA fragmentation factor, 45kDa, alpha polypeptide            |

**8<sup>a</sup>) HPV16\_3H / HPV16\_60H****p value <0,0001**

| gene      | expression      | gene name                                                    |
|-----------|-----------------|--------------------------------------------------------------|
|           | ratio<br>(log2) |                                                              |
| KIAA0247  | -1,42           | KIAA0247                                                     |
| NYREN18   | -1,78           | NEDD8 ultimate buster-1                                      |
| CD44      | 0,94            | CD44 antigen (homing function and Indian blood group system) |
| FLJ10761  | -1,26           | ethanolamine kinase 2                                        |
| MGC32124  | -4,56           | hypothetical protein MGC32124                                |
| B2M       | -2,08           | beta-2-microglobulin                                         |
| TSPYL1    | -1,57           | TSPY-like 1                                                  |
| PRO1073   | -1,37           | PRO1073 protein                                              |
| OCIA      | -1,40           | OCIA domain containing 1                                     |
| SURF5     | 0,91            | surfeit 5                                                    |
| BCL2L1    | 0,93            | BCL2-like 1                                                  |
| C14orf130 | -1,95           | chromosome 14 open reading frame 130                         |
| IFI16     | -2,00           | interferon, gamma-inducible protein 16                       |

**9<sup>a</sup>) HPV18\_3 H/ HPV18\_60H****p value <0,0001**

| gene    | expression      | gene name                                           |
|---------|-----------------|-----------------------------------------------------|
|         | ratio<br>(log2) |                                                     |
| C6orf48 | -1,31           | chromosome 6 open reading frame 48                  |
| CDK10   | -2,09           | cyclin-dependent kinase (CDC2-like) 10              |
| LXN     | -3,87           | latexin                                             |
| CTSC    | 2,29            | cathepsin C                                         |
| THBS1   | 3,21            | thrombospondin 1                                    |
| ABCE1   | 1,97            | ATP-binding cassette, sub-family E (OABP), member 1 |
| CREG    | -1,73           | Cellular Repressor of E1A-stimulated Genes          |

|           |       |                                                                                                                   |
|-----------|-------|-------------------------------------------------------------------------------------------------------------------|
| HBP17     | 2,10  | fibroblast growth factor binding protein 1<br>mitochondrial translation optimization 1 homolog (S.<br>cerevisiae) |
| MTO1      | -1,48 |                                                                                                                   |
| UBN1      | -1,06 | ubinnuclein 1                                                                                                     |
| COL4A1    | 1,68  | collagen, type IV, alpha 1                                                                                        |
| DHRS3     | -2,70 | dehydrogenase/reductase (SDR family) member 3                                                                     |
| Ufc1      | -0,93 | Ufm1-conjugating enzyme 1                                                                                         |
| C14orf114 | -0,99 | chromosome 14 open reading frame 114                                                                              |
| C20orf6   | 1,35  | chromosome 20 open reading frame                                                                                  |

### 10<sup>a</sup>) PHK\_3H / PHK\_TNF3H

p value <0,0001

| gene      | expression<br>ratio<br>(log2) | gene name                                                                              |
|-----------|-------------------------------|----------------------------------------------------------------------------------------|
| CKLFSF4   | -6,16                         | chemokine-like factor super family 4                                                   |
| MAPRE2    | -6,88                         | microtubule-associated protein, RP/EB family, member 2                                 |
| EIF4EBP2  | -3,16                         | eukaryotic translation initiation factor 4E binding protein 2                          |
| ITGA6     | -1,57                         | integrin, alpha 6                                                                      |
| PPARA     | -2,80                         | peroxisome proliferative activated receptor, alpha                                     |
| BCL3      | -3,40                         | B-cell CLL/lymphoma 3                                                                  |
| DSC3      | -1,78                         | desmocollin 3                                                                          |
| ANKRD11   | 2,45                          | ankyrin repeat domain 11<br>hypothetical protein                                       |
| FLJ10700  | -4,31                         | FLJ10700                                                                               |
| NUP205    | -1,43                         | nucleoporin 205kDa                                                                     |
| KCTD15    | -6,25                         | potassium channel tetramerisation domain containing 15                                 |
| CNNM3     | -6,68                         | cyclin M3                                                                              |
| C14orf120 | -3,65                         | chromosome 14 open reading frame 120                                                   |
| ITPKC     | -6,09                         | inositol 1,4,5-trisphosphate 3-kinase C                                                |
| GIT1      | -6,29                         | G protein-coupled receptor kinase interactor 1                                         |
| LCN7      | -5,82                         | lipocalin 7                                                                            |
| SPAG9     | -3,81                         | sperm associated antigen 9                                                             |
| NFKBIA    | -2,07                         | nuclear factor of kappa light polypeptide gene enhancer<br>in B-cells inhibitor, alpha |
| IL6ST     | -3,09                         | interleukin 6 signal transducer (gp130, oncostatin M receptor)                         |
| KLK2      | -3,84                         | kallikrein 2, prostatic                                                                |
| VLDLR     | -5,62                         | very low density lipoprotein receptor                                                  |

### 11<sup>a</sup>) PHK\_60H / PHK\_TNF60H

p valor <0,0001

| gene     | expression<br>ratio<br>(log2) | gene name                                                                              |
|----------|-------------------------------|----------------------------------------------------------------------------------------|
| MGC33488 | 0,68                          | THAP domain containing, apoptosis associated protein 3                                 |
| MAL2     | 1,71                          | mal, T-cell differentiation protein 2                                                  |
| SOD2     | -2,42                         | superoxide dismutase 2, mitochondrial                                                  |
| NFKBIA   | -2,30                         | nuclear factor of kappa light polypeptide gene enhancer<br>in B-cells inhibitor, alpha |

**12<sup>a</sup>) PHK\_TNF3H / PHK\_TNF60H****p value <0,0001**

| gene     | expression |                     | gene name                                                               |
|----------|------------|---------------------|-------------------------------------------------------------------------|
|          | ratio      | (log <sub>2</sub> ) |                                                                         |
| FLJ21511 | -1,83      |                     | hypothetical protein<br>FLJ21511                                        |
| SFRS3    | 1,59       |                     | splicing factor, arginine/serine-rich 3                                 |
| PP784    | -1,29      |                     | PP784 protein                                                           |
| RUNDC1   | 1,87       |                     | RUN domain containing 1                                                 |
| PRKDC    | 0,89       |                     | protein kinase, DNA-activated, catalytic polypeptide                    |
| ARHGEF10 | 0,94       |                     | Rho guanine nucleotide exchange factor (GEF) 10                         |
| HERC3    | -0,57      |                     | hect domain and RLD 3                                                   |
| SLC30A9  | 1,10       |                     | solute carrier family 30 (zinc transporter), member 9                   |
| HBP17    | 1,26       |                     | fibroblast growth factor binding protein 1                              |
| FLJ11106 | 2,24       |                     | thioesterase domain containing 1                                        |
| STK39    | -0,96      |                     | serine threonine kinase 39 (STE20/SPS1 homolog, yeast)                  |
| CA14     | 1,39       |                     | carbonic anhydrase XIV                                                  |
| PPM1B    | 0,83       |                     | protein phosphatase 1B (formerly 2C), magnesium-dependent, beta isoform |
| TLP19    | 1,12       |                     | endoplasmic reticulum thioredoxin superfamily member, 18 kDa            |

**13<sup>a</sup>) HPV16\_3H / HPV16\_TNF3H****p value <0,0001**

| gene  | expression |                     | gene name                       |
|-------|------------|---------------------|---------------------------------|
|       | ratio      | (log <sub>2</sub> ) |                                 |
| CCL20 | -1,93      |                     | chemokine (C-C motif) ligand 20 |

**14<sup>a</sup>) HPV16\_60H / HPV16\_TNF60****p value <0,0001**

| gene | expression  |                     | gene name                             |
|------|-------------|---------------------|---------------------------------------|
|      | ratio       | (log <sub>2</sub> ) |                                       |
| SOD2 | 2,029659266 | -                   | superoxide dismutase 2, mitochondrial |

**15<sup>a</sup>) HPV16\_TNF3H / HPV16\_TNF60H****p value <0,0001**

| gene     | expression |                     | gene name                                                   |
|----------|------------|---------------------|-------------------------------------------------------------|
|          | ratio      | (log <sub>2</sub> ) |                                                             |
| CCL20    | 3,27       |                     | chemokine (C-C motif) ligand 20                             |
| PRKAB1   | -1,62      |                     | protein kinase, AMP-activated, beta 1 non-catalytic subunit |
| FLJ20516 | 1,82       |                     | timeless-interacting protein                                |
| OAT      | 2,75       |                     | ornithine aminotransferase (gyrate atrophy)                 |
| FLJ13213 | 1,38       |                     | hypothetical protein                                        |

|               |       |                                                                                                  |
|---------------|-------|--------------------------------------------------------------------------------------------------|
|               |       | FLJ13213                                                                                         |
| NKTR          | 1,96  | natural killer-tumor recognition sequence<br>source of immunodominant MHC-associated<br>peptides |
| SIMP          | -0,80 |                                                                                                  |
| DKFZP564F0522 | 1,45  | DKFZP564F0522 protein                                                                            |
| PMSCL1        | 0,98  | exosome component 9<br>centrin, EF-hand protein, 3 (CDC31 homolog,<br>yeast)                     |
| CETN3         | 1,42  |                                                                                                  |
| KPNB3         | 1,05  | RAN binding protein 5                                                                            |

**16<sup>a</sup>) HPV18\_3H / HPV18\_TNF3H**

**p value <0,01**

| gene  | expression<br>ratio<br>(log2) | gene name                       |
|-------|-------------------------------|---------------------------------|
| CCL20 | -1,12                         | chemokine (C-C motif) ligand 20 |
| PCBP1 | 0,17                          | poly(rC) binding protein 1      |

**17<sup>a</sup>) HPV18\_60H / HPV18\_TNF60H**

**p value <0,0001**

| gene    | expression<br>ratio<br>(log2) | gene name                                  |
|---------|-------------------------------|--------------------------------------------|
| LAMA3   | -1,42                         | laminin, alpha 3                           |
| ALDH1A3 | -1,75                         | aldehyde dehydrogenase 1 family, member A3 |

**18<sup>a</sup>) HPV18\_TNF3H / HPV18\_TNF60H**

**p value <0,0001**

| gene    | expression<br>ratio<br>(log2) | gene name                                                                                                                                                             |
|---------|-------------------------------|-----------------------------------------------------------------------------------------------------------------------------------------------------------------------|
| CCL20   | 2,13                          | chemokine (C-C motif) ligand 20                                                                                                                                       |
| SCA2    | -0,61                         | ataxin 2-binding protein 1<br>Huntingtin interacting<br>protein K                                                                                                     |
| HYPK    | 1,19                          |                                                                                                                                                                       |
| LXN     | -3,21                         | latexin                                                                                                                                                               |
| NSE1    | -1,29                         | NSE1                                                                                                                                                                  |
| ATP6AP1 | 1,87                          | ATPase, H <sup>+</sup> transporting, lysosomal accessory protein 1                                                                                                    |
| CREG    | -1,64                         | cellular repressor of E1A-stimulated genes 1                                                                                                                          |
| C20orf6 | 1,54                          | chromosome 20 open reading frame 6                                                                                                                                    |
| PCTK3   | -3,19                         | PCTAIRE protein kinase 3                                                                                                                                              |
| HBP17   | 2,25                          | fibroblast growth factor binding protein 1                                                                                                                            |
| CARS    | -1,09                         | cysteinyl-tRNA synthetase                                                                                                                                             |
| UBN1    | -1,20                         | ubiquitin 1<br>G protein-coupled receptor<br>56                                                                                                                       |
| GPR56   | -2,30                         |                                                                                                                                                                       |
| DHX9    | 1,04                          | DEAH (Asp-Glu-Ala-His) box polypeptide 9                                                                                                                              |
| COL4A1  | 1,38                          | collagen, type IV, alpha 1<br>sialyltransferase 7 ((alpha-N-acetylneuraminyl-2,3-<br>beta-<br>galactosyl-1,3)-N-acetyl galactosaminide alpha-2,6-sialyltransferase) B |
| SIAT7B  | -1,82                         |                                                                                                                                                                       |
| LBR     | 1,07                          | lamin B receptor                                                                                                                                                      |



|        |       |                                                |
|--------|-------|------------------------------------------------|
| ZNF189 | 1,17  | NO QUERY                                       |
| UBE2L6 | -1,26 | ubiquitin-conjugating enzyme E2L 6             |
| MGEA5  | 1,26  | meningioma expressed antigen 5 (hyaluronidase) |

**19<sup>a</sup>) PHK\_TNF3H / HPV16\_TNF3H**

**p value <0,0001**

| <b>gene</b> | <b>expression<br/>ratio<br/>(log2)</b> | <b>gene name</b>                                                                                                      |
|-------------|----------------------------------------|-----------------------------------------------------------------------------------------------------------------------|
| KIAA0310    | 1,18                                   | KIAA0310                                                                                                              |
| TGFB114     | 2,37                                   | transforming growth factor beta 1 induced transcript 4                                                                |
| ARHGEF10    | 2,71                                   | Rho guanine nucleotide exchange factor (GEF) 10                                                                       |
| HBP17       | 2,28                                   | fibroblast growth factor binding protein 1                                                                            |
| TPBG        | 2,42                                   | trophoblast glycoprotein                                                                                              |
| HMGCR       | 1,90                                   | 3-hydroxy-3-methylglutaryl-Coenzyme A reductase                                                                       |
| PRSS11      | 4,71                                   | protease, serine, 11 (IGF binding)                                                                                    |
| FLJ11106    | 2,55                                   | thioesterase domain containing 1                                                                                      |
| PPM1B       | 1,61                                   | protein phosphatase 1B (formerly 2C), magnesium-dependent, beta isoform                                               |
| FLJ11588    | 2,84                                   | hypothetical protein<br>FLJ11588                                                                                      |
| EIF3S1      | 1,73                                   | eukaryotic translation initiation factor 3, subunit 1 alpha, 35kDa                                                    |
| LOC133619   | 1,92                                   | hypothetical protein MGC12103                                                                                         |
| ITGA6       | 3,31                                   | integrin, alpha 6                                                                                                     |
| PLAU        | 2,49                                   | plasminogen activator, urokinase                                                                                      |
| RER1        | 1,62                                   | RER1 retention in endoplasmic reticulum 1 homolog (S. cerevisiae)<br>source of immunodominant MHC-associated peptides |
| SIMP        | 1,68                                   | peptides                                                                                                              |
| SF3B4       | -1,83                                  | splicing factor 3b, subunit 4, 49kDa                                                                                  |
| RNF130      | 1,88                                   | ring finger protein 130                                                                                               |
| TMC4        | 1,99                                   | transmembrane channel-like 4                                                                                          |
| FKBP5       | 2,06                                   | FK506 binding protein 5                                                                                               |
| TMEM2       | -0,64                                  | transmembrane protein 2<br>hypothetical protein                                                                       |
| PRO2730     | 1,54                                   | PRO2730                                                                                                               |
| LOC56851    | 2,14                                   | chromosome 15 open reading frame 24                                                                                   |
| NICE-3      | 3,94                                   | chromosome 1 open reading frame 43                                                                                    |
| PEX3        | -1,31                                  | peroxisomal biogenesis factor 3                                                                                       |
| CTCF        | 2,41                                   | CCCTC-binding factor (zinc finger protein)                                                                            |
| PRKAB1      | 1,36                                   | protein kinase, AMP-activated, beta 1 non-catalytic subunit                                                           |
| SAT2        | 2,28                                   | spermidine/spermine N1-acetyltransferase 2                                                                            |
| FDFT1       | 4,30                                   | farnesyl-diphosphate farnesyltransferase 1                                                                            |
| PRO1073     | 1,15                                   | PRO1073 protein                                                                                                       |
| ABR         | -0,62                                  | active BCR-related gene                                                                                               |
| E2IG5       | -1,35                                  | growth and transformation-dependent protein translation factor sui1                                                   |
| GC20        | 1,64                                   | homolog                                                                                                               |
| ENC1        | 1,15                                   | ectodermal-neural cortex (with BTB-like domain)                                                                       |

|               |       |                                                                                               |
|---------------|-------|-----------------------------------------------------------------------------------------------|
| ENAH          | -2,69 | enabled homolog<br>(Drosophila)                                                               |
| FLJ21511      | 1,35  | hypothetical protein<br>FLJ21511                                                              |
| LAMA3         | 2,87  | laminin, alpha 3                                                                              |
| SUPV3L1       | 1,61  | suppressor of var1, 3-like 1 (S. cerevisiae)                                                  |
| PARG          | -2,13 | poly (ADP-ribose) glycohydrolase                                                              |
| LIMK2         | 1,36  | LIM domain kinase 2                                                                           |
| DJ167A19.1    | 1,74  | hypothetical protein DJ167A19.1                                                               |
| CCL20         | -1,86 | chemokine (C-C motif) ligand 20                                                               |
| OSR1          | 4,38  | odd-skipped related 1 (Drosophila)                                                            |
| ZFP90         | 1,60  | zinc finger protein 90 homolog (mouse)<br>ACN9 homolog (S.                                    |
| ACN9          | -1,22 | cerevisiae)                                                                                   |
| OAT           | -2,77 | ornithine aminotransferase (gyrate atrophy)                                                   |
| PGM1          | 1,64  | phosphoglucomutase 1                                                                          |
| H41           | 2,24  | hypothetical protein H41                                                                      |
| MAP4          | 1,45  | microtubule-associated protein 4                                                              |
| POGZ          | -1,68 | pogo transposable element with ZNF domain<br>vesicle-associated membrane protein 3            |
| VAMP3         | 1,25  | (cellubrevin)                                                                                 |
| PPP4R1        | 2,48  | protein phosphatase 4, regulatory subunit 1                                                   |
| LOC84661      | -1,01 | dpy-30-like protein                                                                           |
| CUL1          | 1,90  | cullin 1                                                                                      |
| C20orf111     | -0,93 | chromosome 20 open reading frame 111                                                          |
| ALDH1A3       | 1,73  | aldehyde dehydrogenase 1 family, member A3                                                    |
| DKFZp434D0215 | 1,08  | SH3 domain protein D19                                                                        |
| KIAA0494      | -0,68 | KIAA0494 gene product                                                                         |
| GSR           | -1,06 | glutathione reductase                                                                         |
| MAL2          | -3,13 | mal, T-cell differentiation protein 2<br>CD44 antigen (homing function and Indian blood group |
| CD44          | 1,14  | system)                                                                                       |
| OAS1          | -1,24 | 2',5'-oligoadenylate synthetase 1, 40/46kDa                                                   |
| LACTB2        | -1,86 | lactamase, beta 2                                                                             |
| LCP1          | 1,78  | lymphocyte cytosolic protein 1 (L-plastin)                                                    |
| ECT2          | -1,66 | epithelial cell transforming sequence 2 oncogene                                              |
| D4S234E       | 1,18  | DNA segment on chromosome 4 (unique) 234 expressed sequence                                   |
| PP784         | 0,86  | PP784 protein                                                                                 |
| CDC42BPA      | -0,92 | CDC42 binding protein kinase alpha (DMPK-like)                                                |
| FLJ20073      | -0,99 | sterile alpha motif domain containing 9                                                       |
| RBM3          | -1,50 | RNA binding motif (RNP1, RRM) protein 3                                                       |
| PPIB          | 3,62  | peptidylprolyl isomerase B (cyclophilin B)                                                    |
| LITAF         | 2,10  | lipopolysaccharide-induced TNF factor                                                         |
| ARF4          | 1,39  | ADP-ribosylation factor 1<br>nuclear receptor coactivator                                     |
| NCOA1         | -0,80 | 1<br>fem-1 homolog c                                                                          |
| FEM1C         | 0,99  | (C.elegans)                                                                                   |
| MGC45714      | -1,05 | chromosome 17 open reading frame 32<br>activating transcription                               |
| ATF7          | 4,03  | factor 7                                                                                      |
| GPS1          | -0,54 | G protein pathway suppressor 1                                                                |

|               |       |                                                                                         |
|---------------|-------|-----------------------------------------------------------------------------------------|
| DKFZP586N0721 | 2,26  | SMAD, mothers against DPP homolog 3 (Drosophila)                                        |
| KIAA1671      | -0,67 | KIAA1671 protein                                                                        |
| YWHAH         | -0,81 | tyrosine 3-monooxygenase/tryptophan 5-monooxygenase activation protein, eta polypeptide |
| HNRPA2B1      | -1,18 | heterogeneous nuclear ribonucleoprotein A2/B1                                           |
| MYH10         | -0,72 | myosin, heavy polypeptide 10, non-muscle                                                |
| ARID1B        | 2,70  | AT rich interactive domain 1B (SWI1-like) hypothetical protein                          |
| FLJ13089      | -1,07 | FLJ13089                                                                                |
| MRPS15        | 3,16  | mitochondrial ribosomal protein S15                                                     |

### 20<sup>a</sup>) PHK\_TNF3 H / HPV18\_TNF3H

p value <0,0001

| gene          | expression ratio (log2) | gene name                                             |
|---------------|-------------------------|-------------------------------------------------------|
| PRSS11        | 4,75                    | protease, serine, 11 (IGF binding)                    |
| MAL2          | -3,76                   | mal, T-cell differentiation protein 2                 |
| SF3B4         | -2,04                   | splicing factor 3b, subunit 4, 49kDa                  |
| HBP17         | 1,65                    | fibroblast growth factor binding protein 1            |
| NT5E          | 2,06                    | 5'-nucleotidase, ecto (CD73)                          |
| INPP4B        | -1,14                   | inositol polyphosphate-4-phosphatase, type II, 105kDa |
| HEXB          | -0,62                   | hexosaminidase B (beta polypeptide)                   |
| SLC41A3       | 0,68                    | solute carrier family 41, member 3                    |
| YME1L1        | -1,39                   | YME1-like 1 (S. cerevisiae)                           |
| ODC1          | 1,39                    | ornithine decarboxylase 1                             |
| STAF65(gamma) | -4,79                   | SPTF-associated factor 65 gamma                       |
| ARNT2         | 1,09                    | aryl-hydrocarbon receptor nuclear translocator 2      |
| MGC45400      | 0,78                    | transcription elongation factor A (SII)-like 8        |

### 21<sup>a</sup>) HPV16\_TNF3 H / HPV18\_TNF3H

p value <0,0001

| gene          | expression ratio (log2) | gene name                                   |
|---------------|-------------------------|---------------------------------------------|
| OAS1          | 1,72                    | 2',5'-oligoadenylate synthetase 1, 40/46kDa |
| STAF65(gamma) | -5,54                   | SPTF-associated factor 65 gamma             |
| LOC84661      | 0,92                    | dpy-30-like protein                         |
| C6orf48       | -1,39                   | chromosome 6 open reading frame 48          |

### 22<sup>a</sup>) PHK\_TNF60H / HPV16\_TNF60H

p value <0,0001

| gene   | expression ratio (log2) | gene name                             |
|--------|-------------------------|---------------------------------------|
| MAL2   | -2,24                   | mal, T-cell differentiation protein 2 |
| TCERG1 | 1,29                    | transcription elongation regulator 1  |

|          |       |                                                                                |
|----------|-------|--------------------------------------------------------------------------------|
| ESDN     | 3,30  | discoidin, CUB and LCCL domain containing 2                                    |
| MGC33488 | -1,63 | THAP domain containing, apoptosis associated protein 3                         |
| DOCK9    | 2,28  | dedicator of cytokinesis 9                                                     |
| CITED1   | -1,21 | Cbp/p300-interacting transactivator with Glu/Asp-rich carboxy-terminal domain1 |
| SLMAP    | 2,54  | sarcolemma associated protein                                                  |
| TACR2    | -0,53 | tachykinin receptor 2                                                          |
| PRSS11   | 3,38  | protease, serine, 11 (IGF binding) Notch homolog 2                             |
| NOTCH2   | 1,50  | (Drosophila)                                                                   |
| FNBP3    | -0,54 | formin binding protein 3                                                       |
| HBP17    | 2,12  | fibroblast growth factor binding protein 1                                     |
| FKBP5    | 1,67  | FK506 binding protein 5                                                        |
| TPRT     | 1,56  | trans-prenyltransferase                                                        |
| PPGB     | -1,26 | protective protein for beta-galactosidase (galactosialidosis)                  |

**23<sup>a</sup>) PHK\_TNF60H / HPV18\_TNF60H**

**p value <0,0001**

| gene       | expression ratio (log2) | gene name                                                                               |
|------------|-------------------------|-----------------------------------------------------------------------------------------|
| MYO5B      | -2,54                   | myosin VB                                                                               |
| MAL2       | -4,50                   | mal, T-cell differentiation protein 2                                                   |
| GPR56      | -2,13                   | G protein-coupled receptor 56                                                           |
| LXN        | -3,12                   | latexin                                                                                 |
| MGC45400   | 0,85                    | transcription elongation factor A (SII)-like 8                                          |
| MRPS35     | -1,93                   | mitochondrial ribosomal protein S35                                                     |
| FLJ21511   | 2,31                    | hypothetical protein FLJ21511                                                           |
| SF3B4      | -2,12                   | splicing factor 3b, subunit 4, 49kDa                                                    |
| RUNDC1     | -1,98                   | RUN domain containing 1                                                                 |
| MEST       | -1,06                   | mesoderm specific transcript homolog (mouse)                                            |
| PRSS11     | 4,89                    | protease, serine, 11 (IGF binding)                                                      |
| CSTA       | 3,83                    | cystatin A (stefin A)                                                                   |
| NMES1      | -3,79                   | normal mucosa of esophagus specific 1                                                   |
| GCAT       | -1,73                   | glycine C-acetyltransferase (2-amino-3-ketobutyrate coenzyme A ligase)                  |
| RAB31      | 2,68                    | RAB31, member RAS oncogene family solute carrier family 30 (zinc transporter), member 9 |
| SLC30A9    | -1,91                   | 9                                                                                       |
| DHRS3      | -4,01                   | dehydrogenase/reductase (SDR family) member 3                                           |
| FKBP5      | 2,08                    | dehydrogenase/reductase (SDR family) member 3                                           |
| PMP22      | -2,05                   | peripheral myelin protein 22                                                            |
| ESDN       | 2,62                    | discoidin, CUB and LCCL domain containing 2                                             |
| DJ167A19.1 | -1,60                   | hypothetical protein DJ167A19.1                                                         |
| SNAI2      | 2,82                    | snail homolog 2 (Drosophila)                                                            |
| RER1       | -0,93                   | RER1 retention in endoplasmic reticulum 1 homolog (S. cerevisiae)                       |

|               |       |                                                                                |
|---------------|-------|--------------------------------------------------------------------------------|
| CLCA4         | 2,23  | chloride channel, calcium activated, family member 4                           |
| SEC61A1       | -2,20 | Sec61 alpha 1 subunit ( <i>S. cerevisiae</i> )                                 |
| CITED1        | -1,23 | Cbp/p300-interacting transactivator with Glu/Asp-rich carboxy-terminal domain1 |
| KCNK6         | -2,71 | potassium channel, subfamily K, member 6                                       |
| ZMPSTE24      | -2,07 | zinc metallopeptidase (STE24 homolog, yeast)                                   |
| STAF65(gamma) | -6,09 | SPTF-associated factor 65 gamma                                                |
| CKLFSF6       | 2,05  | chemokine-like factor super family 6                                           |
| TRAM1         | -2,24 | translocation associated membrane protein 1                                    |
| RANGAP1       | -1,57 | RAN binding protein 1                                                          |
| SLMAP         | 1,61  | sarcolemma associated protein                                                  |
| NSE2          | -1,61 | breast cancer membrane protein 101                                             |
| C10orf76      | -3,46 | chromosome 10 open reading frame 76                                            |
| MGEA5         | 2,19  | meningioma expressed antigen 5 (hyaluronidase)                                 |
| SOD2          | 2,09  | superoxide dismutase 2, mitochondrial                                          |
| ADORA2B       | -2,32 | adenosine A2b receptor                                                         |
| PPIB          | -3,00 | peptidylprolyl isomerase B (cyclophilin B)                                     |
| CHAF1A        | 1,69  | chromatin assembly factor 1, subunit A (p150)                                  |
| SPPL3         | -0,85 | signal peptide peptidase 3                                                     |
| C6orf37       | -2,09 | family with sequence similarity 46, member A                                   |
| NT5E          | 2,58  | 5'-nucleotidase, ecto (CD73)                                                   |
| LCN2          | -5,11 | lipocalin 2 (oncogene 24p3)                                                    |
| MYO10         | 2,04  | myosin X                                                                       |
| PARVA         | 1,41  | parvin, alpha                                                                  |
| GBF1          | -3,12 | golgi-specific brefeldin A resistance factor 1                                 |
| ZF            | 0,85  | HCF-binding transcription factor Zhangfei                                      |
| UCHL3         | -1,37 | ubiquitin carboxyl-terminal esterase L3 (ubiquitin thiolesterase)              |
| HBP17         | 2,63  | fibroblast growth factor binding protein 1                                     |
| JMJD1B        | 1,12  | jumonji domain containing 1B                                                   |
| CSNK1A1       | 1,89  | casein kinase 1, alpha 1                                                       |
| GOLPH2        | -1,47 | golgi phosphoprotein 2                                                         |
| ENAH          | 1,66  | enabled homolog ( <i>Drosophila</i> )                                          |
| EPS8L1        | -2,29 | EPS8-like 1                                                                    |
| FAP           | -2,84 | fibroblast activation protein, alpha                                           |
| NOTCH2        | 1,52  | Notch homolog 2 ( <i>Drosophila</i> )                                          |
| ENTH          | -1,84 | enthoproin                                                                     |
| PRKDC         | -1,53 | protein kinase, DNA-activated, catalytic polypeptide                           |
| LOC51204      | -1,68 | clone HQ0477 PRO0477p                                                          |
| C6orf48       | -1,61 | chromosome 6 open reading frame 48                                             |
| NICE-3        | -1,84 | chromosome 1 open reading frame 43                                             |
| HAX1          | -4,57 | HS1 binding protein                                                            |
| Ufc1          | -1,24 | Ufm1-conjugating enzyme 1                                                      |
| CAPG          | -3,47 | capping protein (actin filament), gelsolin-like                                |
| CREG          | -2,35 | cellular repressor of E1A-stimulated genes 1                                   |

|          |       |                                                                                                                |
|----------|-------|----------------------------------------------------------------------------------------------------------------|
| PRKCBP1  | -1,18 | protein kinase C binding protein 1                                                                             |
| LACTB2   | -1,50 | lactamase, beta 2                                                                                              |
| NYREN18  | -0,65 | ultimate buster-1                                                                                              |
| SSR4     | -2,53 | signal sequence receptor, delta<br>(translocon-associated protein delta)                                       |
| TES      | -2,56 | testis derived transcript (3 LIM domains)<br>UDP-GlcNAc:betaGal beta-1,3-N-<br>acetylglucosaminyltransferase 5 |
| B3GNT5   | -1,90 | HIRA interacting protein 5                                                                                     |
| HIRIP5   | -1,19 | mitochondrial translation optimization 1 homolog (S.<br>cerevisiae)                                            |
| MTO1     | -2,10 | zinc finger protein 38                                                                                         |
| ZNF38    | 0,65  | CDK5 regulatory subunit associated protein 2                                                                   |
| CDK5RAP2 | -1,10 | chromosome 1 open reading frame 25                                                                             |
| C1orf25  | 1,19  | SEC22 vesicle trafficking protein-like 3 (S.<br>cerevisiae)                                                    |
| SEC22L3  | -0,95 | tumor suppressing subtransferable candidate 1                                                                  |
| TSSC1    | -1,08 | ATPase, H <sup>+</sup> transporting, lysosomal accessory protein 1                                             |
| ATP6AP1  | 3,47  | activating transcription<br>factor 7                                                                           |
| ATF7     | -3,10 | SH3-domain kinase binding protein 1                                                                            |
| SH3KBP1  | -1,08 | microtubule-associated protein 1B                                                                              |
| MAP1B    | -0,71 | aminoadipate-semialdehyde dehydrogenase-<br>phosphopantetheinyl<br>transferase                                 |
| AASDHPPT | -1,11 | TH1-like (Drosophila)                                                                                          |
| TH1L     | -2,57 | interleukin 4 receptor                                                                                         |
| IL4R     | -1,65 | WD repeat domain 13                                                                                            |
| WDR13    | -1,29 | MCM2 minichromosome maintenance deficient 2,<br>mitotin (S. cerevisiae)                                        |
| MCM2     | -1,67 | tumor-associated calcium signal transducer 1                                                                   |
| TACSTD1  | -1,03 |                                                                                                                |

#### 24<sup>a</sup>) HPV16\_ TNF60H / HPV18\_ TNF60H

p value <0,0001

| gene          | expression<br>ratio<br>(log2) | gene name                                                                          |
|---------------|-------------------------------|------------------------------------------------------------------------------------|
| MYO5B         | -2,88                         | myosin VB                                                                          |
| SOD2          | 2,50                          | superoxide dismutase 2, mitochondrial                                              |
| MAL2          | -2,25                         | mal, T-cell differentiation protein 2                                              |
| STAF65(gamma) | -6,02                         | SPTF-associated factor 65 gamma                                                    |
| ERAL1         | -0,90                         | Era G-protein-like 1 (E. coli)                                                     |
| ATP6AP1       | 1,12                          | ATPase, H <sup>+</sup> transporting, lysosomal accessory protein 1                 |
| GOLPH2        | -1,46                         | golgi phosphoprotein 2<br>solute carrier family 30 (zinc transporter), member<br>9 |
| SLC30A9       | -1,04                         | ribosomal protein L15                                                              |
| RPL15         | -2,10                         | normal mucosa of esophagus specific 1                                              |
| NMES1         | -1,90                         | likely ortholog of rat vacuole membrane protein 1                                  |
| VMP1          | 1,05                          |                                                                                    |
