# Supplementary material for: Characterization of global transcription profile of normal and HPV-immortalized keratinocytes and their response to TNF treatment
Source: PubMed Central journal article supplement (PMC2459201; doi:10.1186/1755-8794-1-29), 2008-06-27

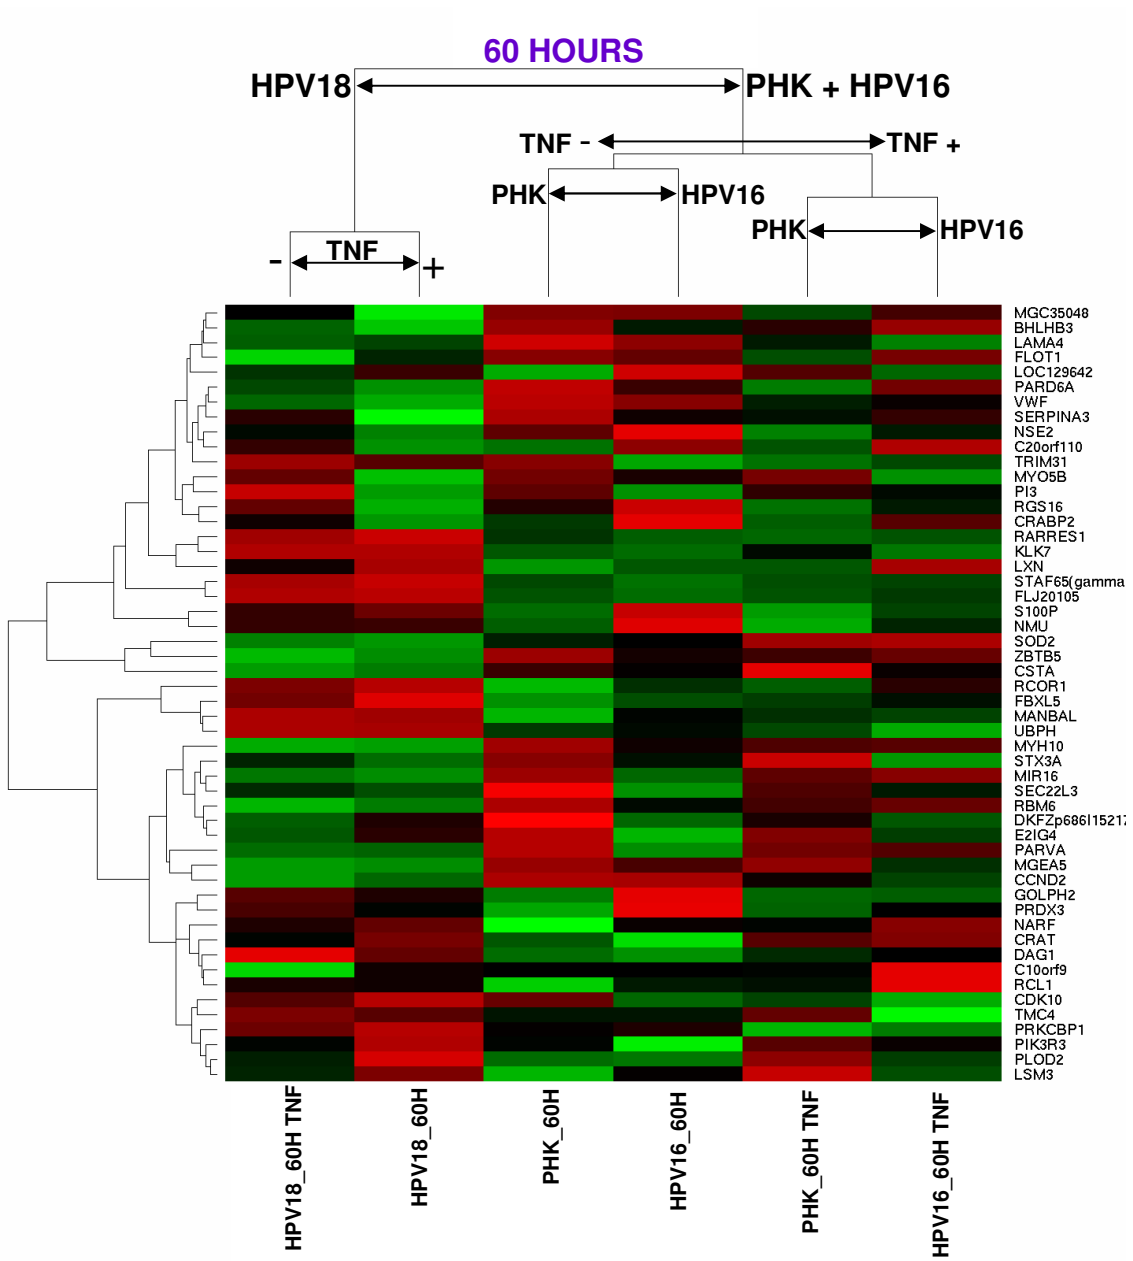

Supplement: 1755-8794-1-29-S4.pdf [file 1755-8794-1-29-S4.pdf]
