# Supplementary material for: Characterization of global transcription profile of normal and HPV-immortalized keratinocytes and their response to TNF treatment
Source: PubMed Central journal article supplement (PMC2459201; doi:10.1186/1755-8794-1-29), 2008-06-27
Supplement: 1755-8794-1-29-S5.pdf [file 1755-8794-1-29-S5.pdf]

| GENE                    | GENE NAME                                                                        | (PHK and HPV16)<br>vs HPV18 |          | (PHK_TNF and HPV16_TNF)<br>vs HPV18_TNF |         |
|-------------------------|----------------------------------------------------------------------------------|-----------------------------|----------|-----------------------------------------|---------|
|                         |                                                                                  | FOLD                        | p VALUE  | FOLD                                    | p VALUE |
| <b>BHLHB3</b>           | <i>basic helix-loop-helix domain containing, class B, 3</i>                      | ----                        | ----     | 0.44408                                 | 1.2e-05 |
| <b>C10orf9</b>          | <i>Cyclin Y</i>                                                                  | 0.605839                    | 0.000247 | ----                                    | ----    |
| <b>C20orf110</b>        | <i>tumor protein p53 inducible nuclear protein 2</i>                             | ----                        | ----     | 0.374386                                | 1.9e-05 |
| <b>CCND2</b>            | <i>cyclin D2</i>                                                                 | 2.957399                    | 9.6e-05  | ----                                    | ----    |
| <b>CDK10</b>            | <i>cyclin-dependent kinase (CDC2-like) 10</i>                                    | 0.285227                    | 0.000125 | ----                                    | ----    |
| <b>CRABP2</b>           | <i>cellular retinoic acid binding protein 2</i>                                  | ----                        | ----     | 0.276522                                | 2.2e-05 |
| <b>CRAT</b>             | <i>carnitine acetyltransferase</i>                                               | 0.343795                    | 1e-06    | ----                                    | ----    |
| <b>CSTA</b>             | <i>cystatin A (stefin A)</i>                                                     | 2.864497                    | 1.6e-05  | ----                                    | ----    |
| <b><u>DAG1</u></b>      | <i>dystroglycan 1</i>                                                            | 0.474152                    | 0.000138 | 0.329814                                | 3e-06   |
| <b>DKFZp686115217</b>   | <i>DKFZp686115217</i>                                                            | 0.507912                    | 7.4e-05  | ----                                    | ----    |
| <b>E2IG4</b>            | <i>likely ortholog of chicken tsukushi</i>                                       | 0.554887                    | 2.5e-05  | ----                                    | ----    |
| <b>FBXL5</b>            | <i>F-box and leucine-rich repeat protein 5</i>                                   | 0.291319                    | 0.000167 | ----                                    | ----    |
| <b><u>FLJ20105</u></b>  | <i>FLJ20105</i>                                                                  | 0.01189                     | 0        | 0.010515                                | 0       |
| <b>FLOT1</b>            | <i>flotillin 1</i>                                                               | 0.384462                    | 7.6e-05  | ----                                    | ----    |
| <b>GOLPH2</b>           | <i>golgi phosphoprotein 2</i>                                                    | ----                        | ----     | 0.36294                                 | 0       |
| <b><u>KLK7</u></b>      | <i>kallikrein 7 (chymotryptic, stratum corneum)</i>                              | 0.059733                    | 0        | 0.047716                                | 0       |
| <b>LAMA4</b>            | <i>laminin, alpha 4</i>                                                          | ----                        | ----     | 0.320101                                | 2e-06   |
| <b><u>LOC129642</u></b> | <i>O-acyltransferase (membrane bound)domain containing 2</i>                     | 0.305784                    | 7e-05    | 0.362908                                | 8e-06   |
| <b>LSM3</b>             | <i>LSM3 homolog, U6 small nuclear RNA associated (S. cerevisiae)</i>             | 0.532545                    | 5.9e-05  | ----                                    | ----    |
| <b>LXN</b>              | <i>latexin</i>                                                                   | 0.06076                     | 0        | ----                                    | ----    |
| <b>MANBAL</b>           | <i>mannosidase, beta A, lysosomal-like</i>                                       | ----                        | ----     | 0.370772                                | 6e-06   |
| <b>MGC35048</b>         | <i>hypothetical protein MGC35048</i>                                             | ----                        | ----     | 0.27868                                 | 0       |
| <b>MGEA5</b>            | <i>meningioma expressed antigen 5 (hyaluronidase)</i>                            | 3.402304                    | 6e-06    | ----                                    | ----    |
| <b>MIR16</b>            | <i>membrane interacting protein of RGS16</i>                                     | 0.662855                    | 7e-05    | ----                                    | ----    |
| <b>MYH10</b>            | <i>encoding myosin, heavy polypeptide 10, non-muscle</i>                         | 1.836818                    | 0.000209 | ----                                    | ----    |
| <b>MYO5B</b>            | <i>acetyl-Coenzyme A acyltransferase 2</i>                                       | ----                        | ----     | 0.152971                                | 0       |
| <b>NARF</b>             | <i>nuclear prelamin A recognition factor</i>                                     | 0.256847                    | 7.6e-05  | ----                                    | ----    |
| <b>NMU</b>              | <i>neuromedin U</i>                                                              | ----                        | ----     | 0.058214                                | 1e-06   |
| <b>NSE2</b>             | <i>breast cancer membrane protein 101</i>                                        | ----                        | ----     | 0.348974                                | 2e-06   |
| <b>PARD6A</b>           | <i>par-6 partitioning defective 6 homolog alpha (C.elegans)</i>                  | ----                        | ----     | 0.39875                                 | 2.1e-05 |
| <b>PARVA</b>            | <i>parvin, alpha</i>                                                             | ----                        | ----     | 2.560157                                | 2.1e-05 |
| <b>PI3</b>              | <i>protease inhibitor 3, skin-derived (SKALP)</i>                                | ----                        | ----     | 0.096425                                | 0       |
| <b>PIK3R3</b>           | <i>phosphoinositide-3-kinase, regulatory subunit, polypeptide 3 (p55, gamma)</i> | 0.586743                    | 9.9e-05  | ----                                    | ----    |
| <b>PLOD2</b>            | <i>procollagen-lysine</i>                                                        | 0.455836                    | 0.000133 | ----                                    | ----    |
| <b>PRDX3</b>            | <i>peroxiredoxin 3</i>                                                           | ----                        | ----     | 0.422824                                | 3.2e-05 |

|                              |                                                                 |          |          |          |         |
|------------------------------|-----------------------------------------------------------------|----------|----------|----------|---------|
| <b><u>PRKCBP1</u></b>        | <i>protein kinase C binding protein 1</i>                       | 0.520862 | 0        | 0.450365 | 2e-06   |
| <b><u>RARRES1</u></b>        | <i>retinoic acid receptor responder</i>                         | 0.029146 | 0        | 0.027975 | 0       |
| <b>RBM6</b>                  | <i>RNA binding motif protein 6</i>                              | 0.792829 | 0.000193 | ----     | ----    |
| <b>RCL1</b>                  | <i>terminal phosphate cyclase-like 1</i>                        | 0.592469 | 0.000133 | ----     | ----    |
| <b>RCOR1</b>                 | <i>REST corepressor 1</i>                                       | 0.170143 | 0.000262 | ----     | ----    |
| <b>RGS16</b>                 | <i>regulator of G-protein signalling 16</i>                     | ----     | ----     | 0.126675 | 6e-06   |
| <b><u>S100P</u></b>          | <i>S100 calcium binding protein P</i>                           | 0.053016 | 1.5e-05  | 0.03839  | 0       |
| <b>SEC22L3</b>               | <i>SEC22 vesicle trafficking protein-like 3 (S. cerevisiae)</i> | ----     | ----     | 0.486028 | 1.2e-05 |
| <b>SERPINA3</b>              | <i>serine (or cysteine) proteinase inhibitor</i>                | ----     | ----     | 0.300802 | 3e-06   |
| <b>SOD2</b>                  | <i>superoxide dismutase 2</i>                                   | ----     | ----     | 4.901559 | 0       |
| <b><u>STAF65 (gamma)</u></b> | <i>SPTF-associated factor 65 gamma</i>                          | 0.013265 | 0        | 0.015004 | 0       |
| <b>STX3A</b>                 | <i>olfactory receptor, family 10, subfamily Y</i>               | 0.688883 | 0.00019  | ----     | ----    |
| <b>TMC4</b>                  | <i>transmembrane channel-like 4</i>                             | 0.492301 | 5.1e-05  | ----     | ----    |
| <b>TRIM31</b>                | <i>tripartite motif-containing 31</i>                           | ----     | ----     | 0.178779 | 0       |
| <b>UBPH</b>                  | <i>similar to ubiquitin binding protein</i>                     | ----     | ----     | 0.437032 | 6e-06   |
| <b>VWF</b>                   | <i>von Willebrand factor</i>                                    | ----     | ----     | 0.485927 | 2.2e-05 |
| <b>ZBTB5</b>                 | <i>zinc finger and BTB domain containing 5</i>                  | ----     | ----     | 4.239272 | 2.6e-05 |

\*Genes are listed in alphabetical order. Underlined genes were identified as differentially expressed between TNF sensitive and TNF resistant cells in both culture conditions.
